# Supplementary material for: High levels of primary biogenic organic aerosols are driven by only a few plant-associated microbial taxa
Source: Copernicus journal article supplement (doi:10.5194/acp-20-5609-2020), 2020-05-13
Supplement: Supplementary file 1 [file acp-20-5609-2020-supplement.pdf]

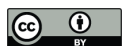

*Supplement of*

**High levels of primary biogenic organic aerosols are driven by only a few plant-associated microbial taxa**

**Abdoulaye Samaké et al.**

*Correspondence to:* Abdoulaye Samaké ([abdoulaye.samake2@univ-grenoble-alpes.fr](mailto:abdoulaye.samake2@univ-grenoble-alpes.fr)) and Jean Martins ([jean.martins@univ-grenoble-alpes.fr](mailto:jean.martins@univ-grenoble-alpes.fr))

The copyright of individual parts of the supplement might differ from the CC BY 4.0 License.

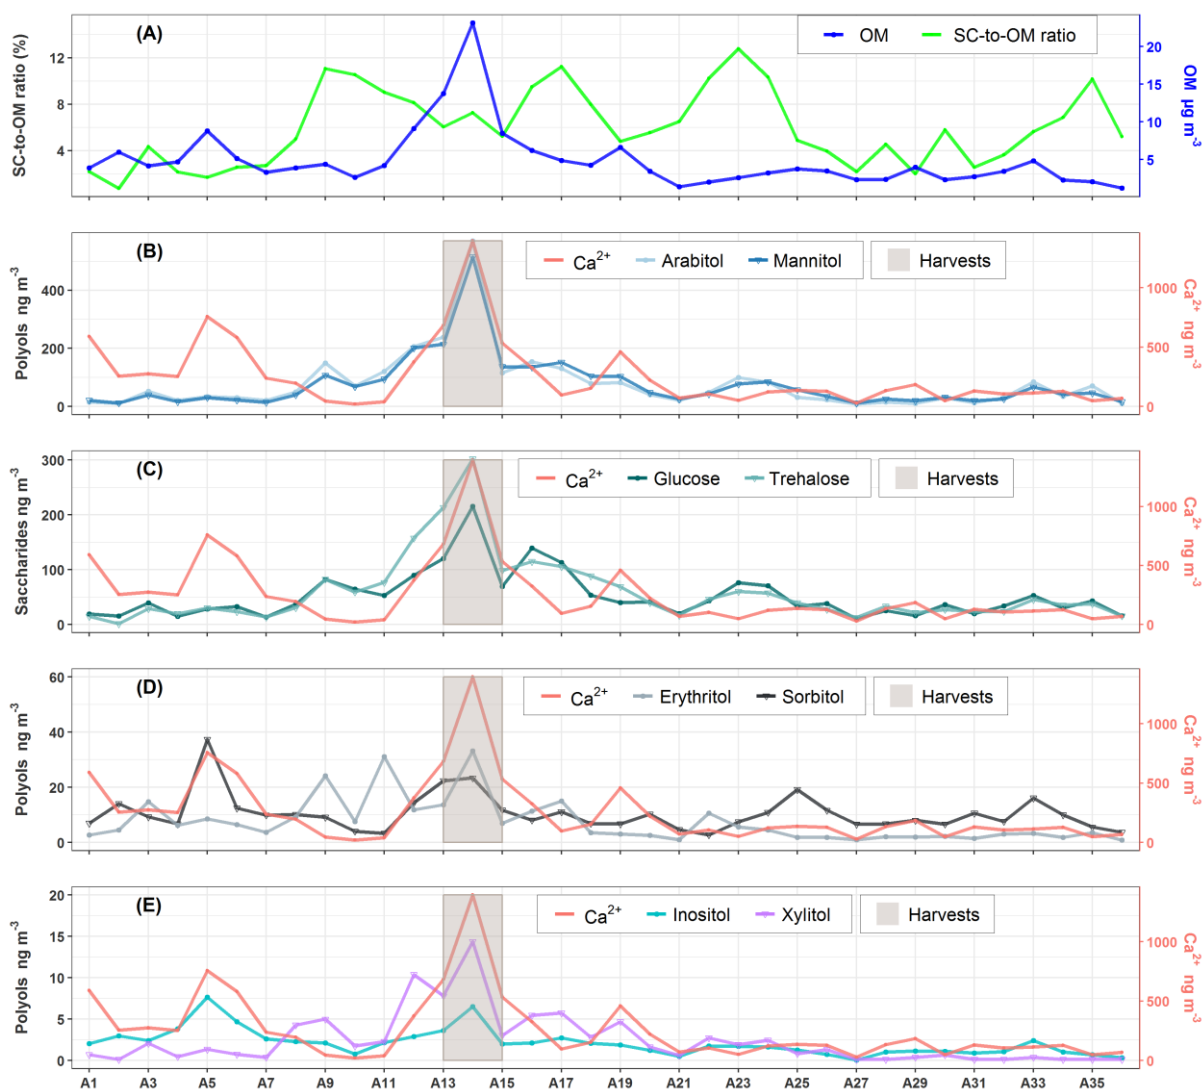

**Figure S1: Atmospheric concentrations of carbonaceous components in  $\text{PM}_{10}$ . Temporal variations of primary sugar compounds in composite  $\text{PM}_{10}$  and calcium concentrations along with daily agricultural activities performed around the study site.**

**Table S1: Identification of PM<sub>10</sub> composite sample. Some daily filter samples were pooled together to form the composite samples used in MiSeq sequencing analysis.**

| Sampling date |            | Sample identifier |
|---------------|------------|-------------------|
| 12/06/2017    | 14/06/2017 | A1                |
|               | 15/06/2017 | A2                |
| 16/06/2017    | 17/06/2017 | A3                |
| 18/06/2017    | 19/06/2017 | A4                |
| 22/06/2017    | 23/06/2017 | A5                |
| 24/06/2017    | 25/06/2017 | A6                |
|               | 26/06/2017 | A7                |
| 27/06/2017    | 28/06/2017 | A8                |
| 29/06/2017    | 30/06/2017 | A9                |
|               | 01/07/2017 | A10               |
| 02/07/2017    | 03/07/2017 | A11               |
| 04/07/2017    | 06/07/2017 | A12               |
|               | 07/07/2017 | A13               |
|               | 08/07/2017 | A14               |
|               | 09/07/2017 | A15               |
|               | 10/07/2017 | A16               |
| 11/07/2017    | 12/07/2017 | A17               |
| 14/07/2017    | 15/07/2017 | A18               |
| 17/07/2017    | 18/07/2017 | A19               |
| 22/07/2017    | 23/07/2017 | A20               |
|               | 24/07/2017 | A21               |
| 25/07/2017    | 26/07/2017 | A22               |
|               | 27/07/2017 | A23               |
| 28/07/2017    | 29/07/2017 | A24               |
| 30/07/2017    | 31/07/2017 | A25               |
|               | 01/08/2017 | A26               |
| 02/08/2017    | 03/08/2017 | A27               |
| 06/08/2017    | 07/08/2017 | A28               |
|               | 08/08/2017 | A29               |
| 09/08/2017    | 10/08/2017 | A30               |
| 13/08/2017    | 15/08/2017 | A31               |
|               | 16/08/2017 | A32               |
|               | 17/08/2017 | A33               |
|               | 18/08/2017 | A34               |
|               | 19/08/2017 | A35               |
| 20/08/2017    | 21/08/2017 | A36               |

**Table S2: Minimum number of MOTUs reads per sample types. Unless specified otherwise, samples are randomly normalized to the smallest number of reads for within and between sample comparisons.**

|          | Aerosols (PM <sub>10</sub> ) | Leaves | Surface soils |
|----------|------------------------------|--------|---------------|
| Fungi    | 7 223                        | 6 628  | 4 287         |
| Bacteria | 2 865                        | 16 502 | 5 043         |

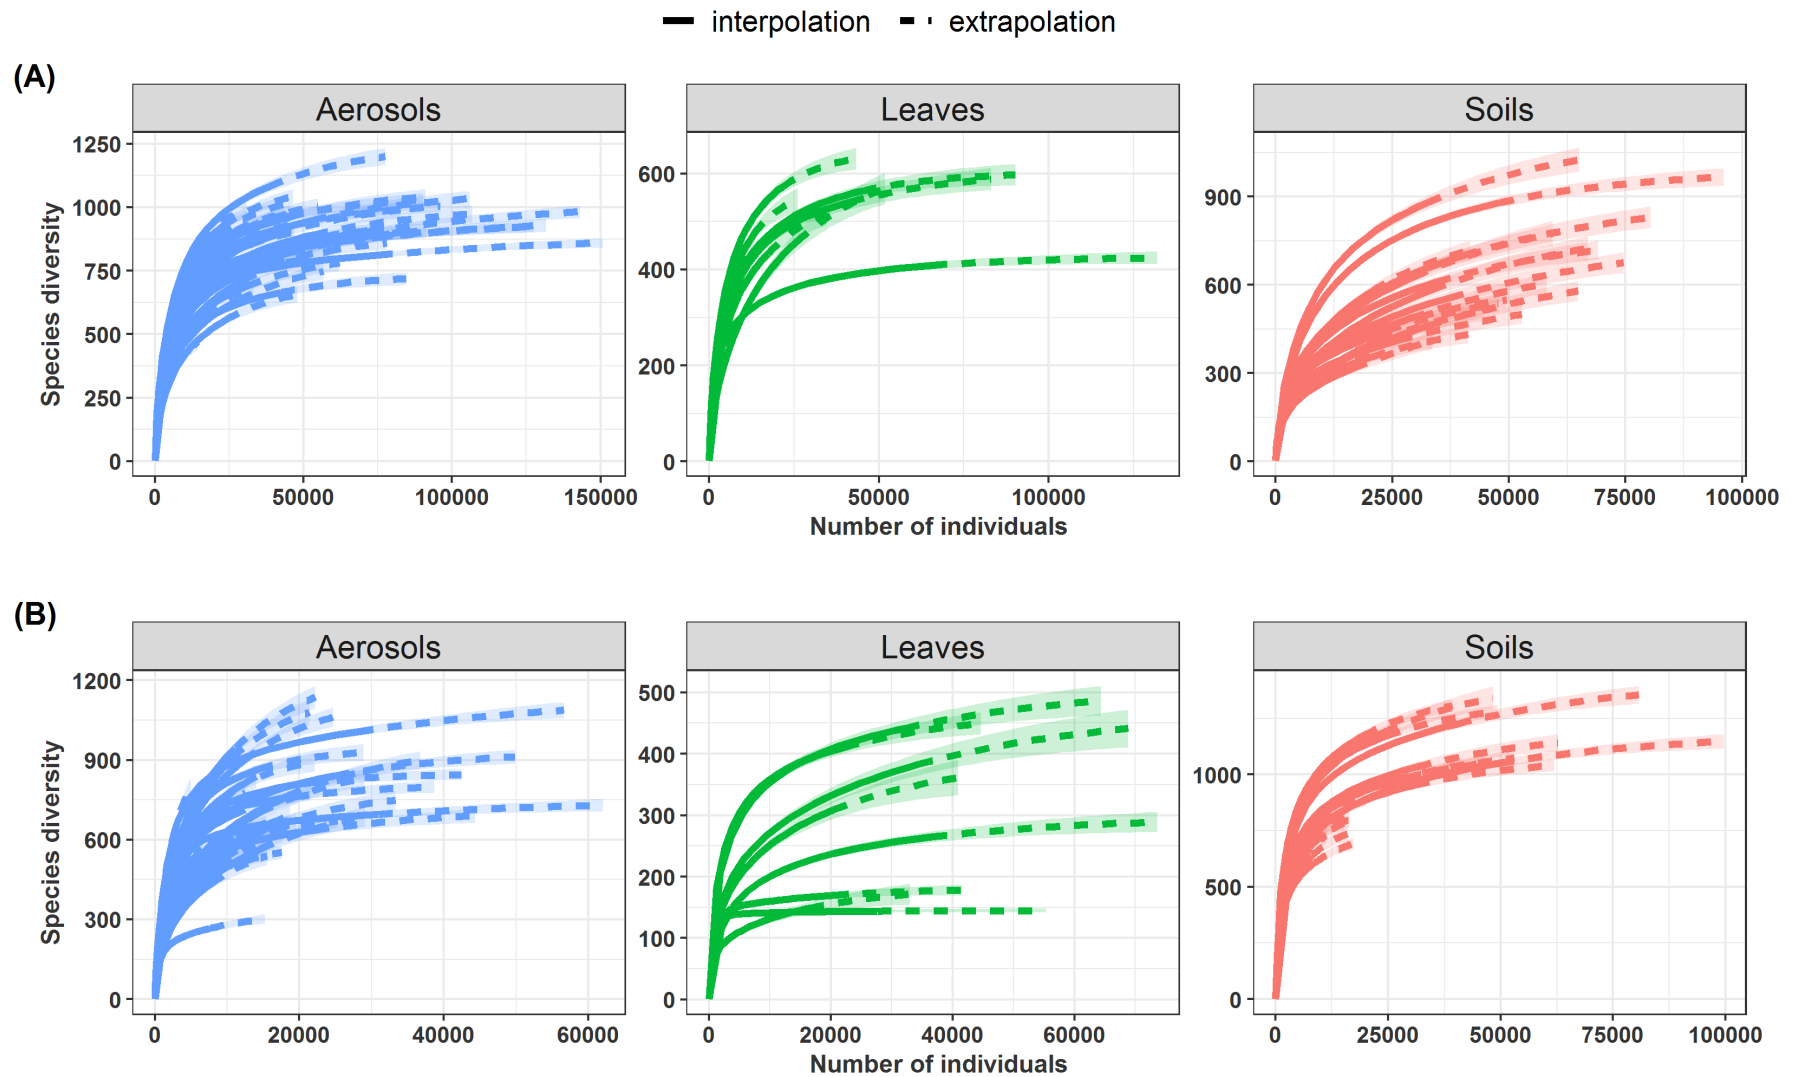

**Figure S2: Rarefaction curves of MOTUs abundance grouped by types of samples. (A) Fungal and (B) bacterial MOTUs. Solid curves represent the observations while the dashed ones show the interpolation.**

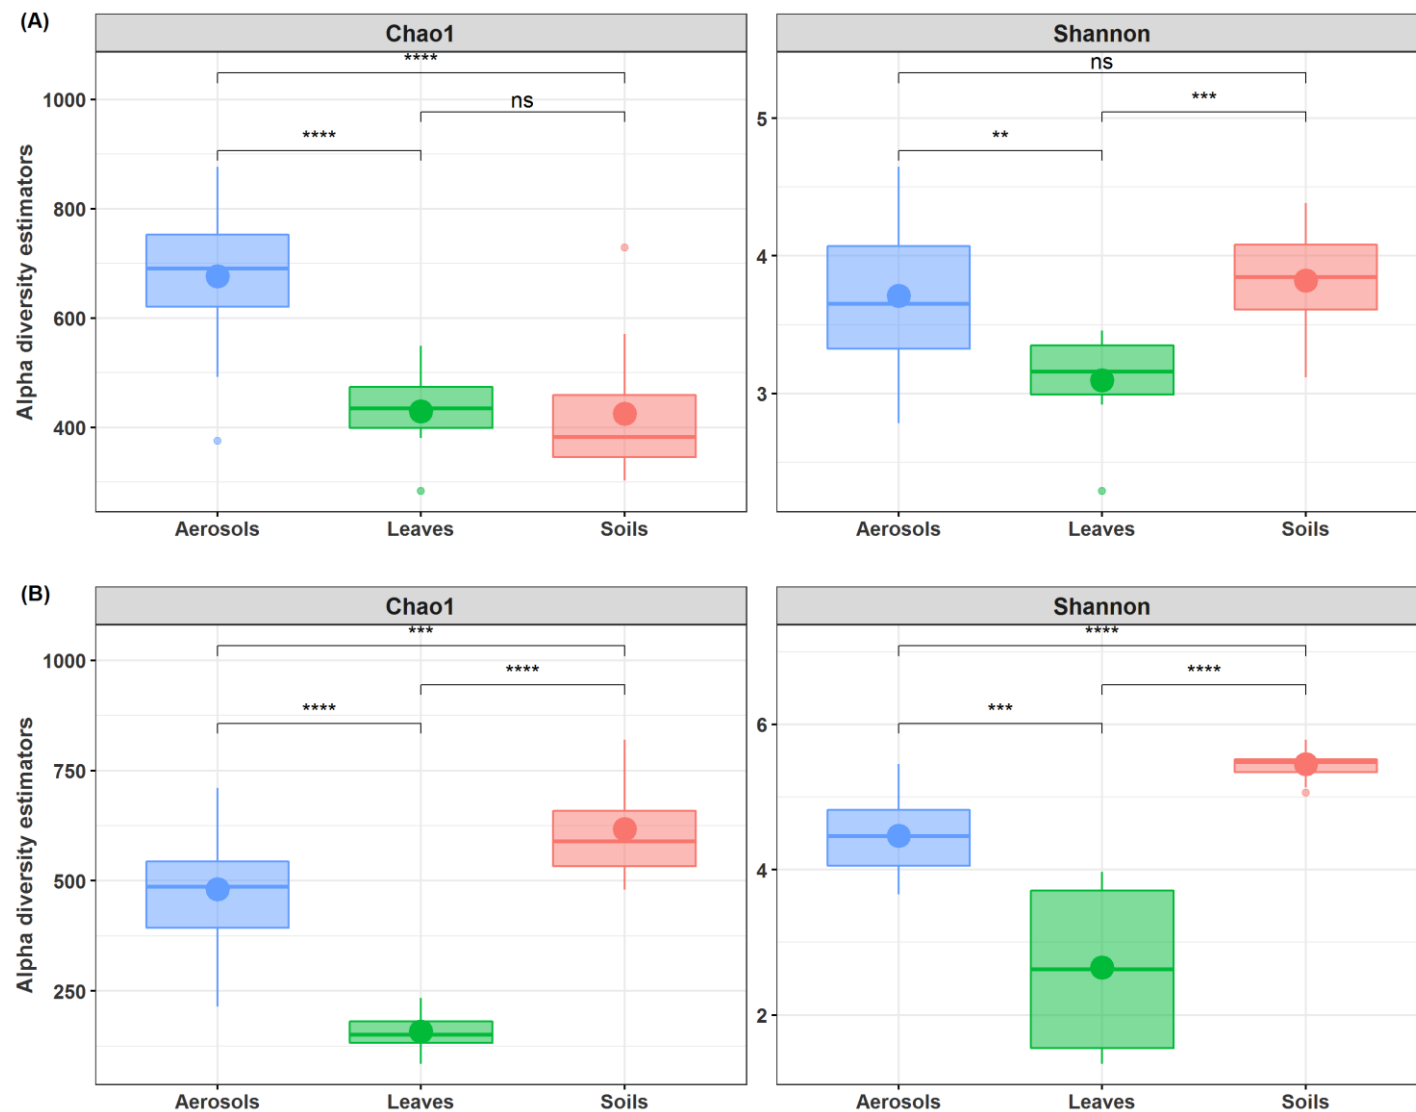

**Figure S3: Statistical comparisons of MOTUs richness and diversity across different types of samples. (A) Fungal and (B) bacterial MOTUs abundance. Data sets are rarefied at the same sequencing depth for each library.**

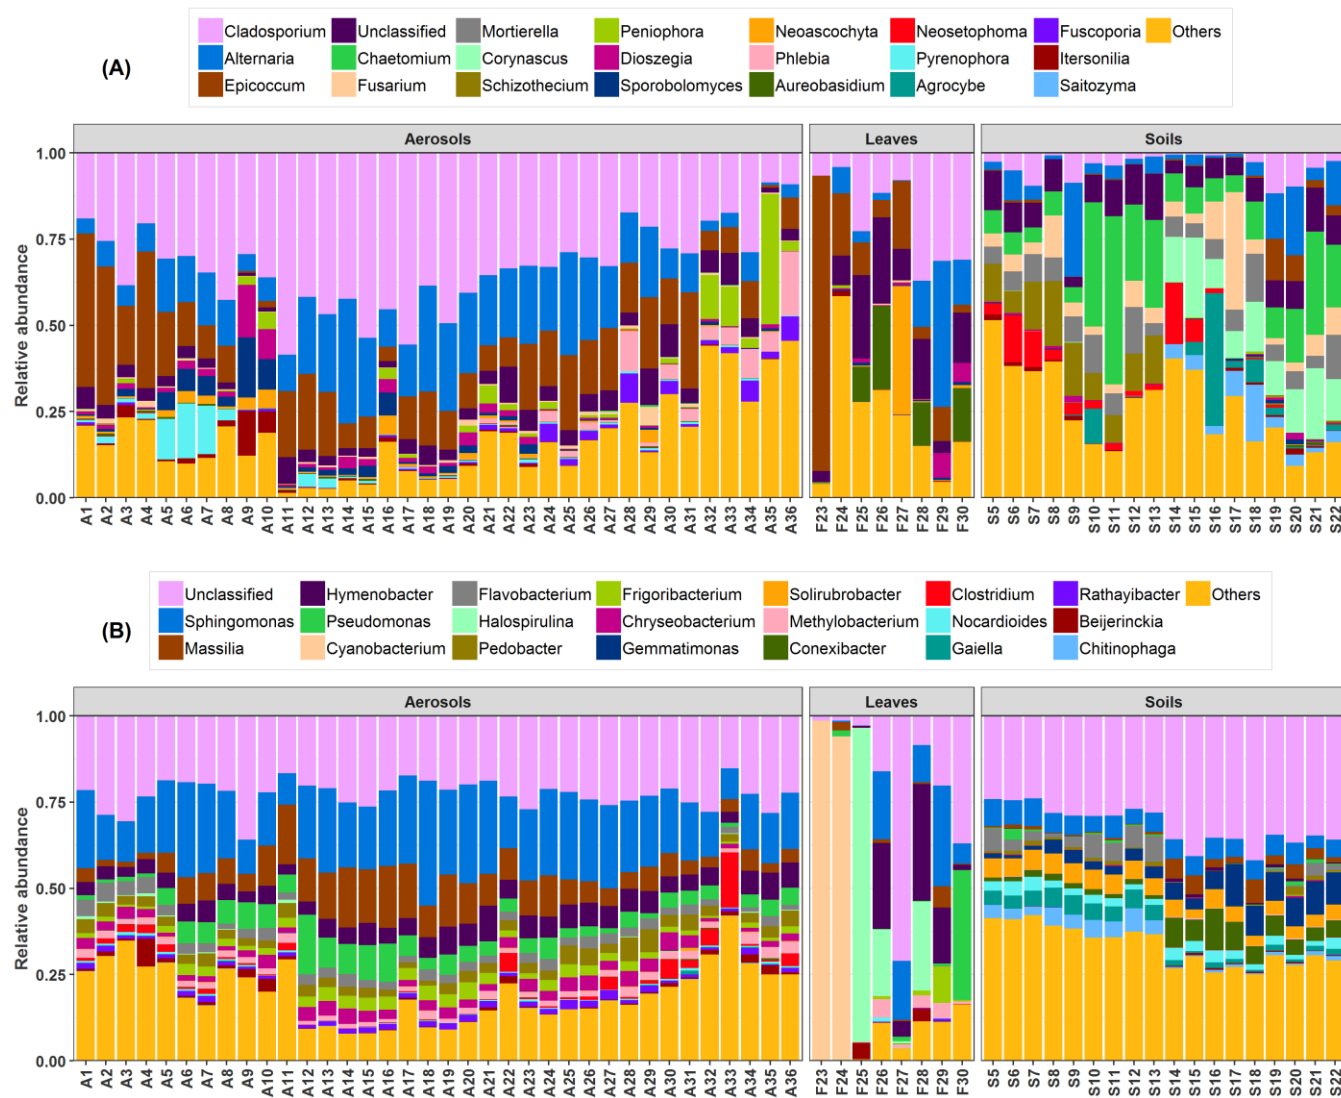

**Figure S4: Temporal dynamics of microbial relative abundance (normalized to sum 1). Only the most pronounced top 21 of respectively (A) fungal (B) and bacterial genera are labelled.**

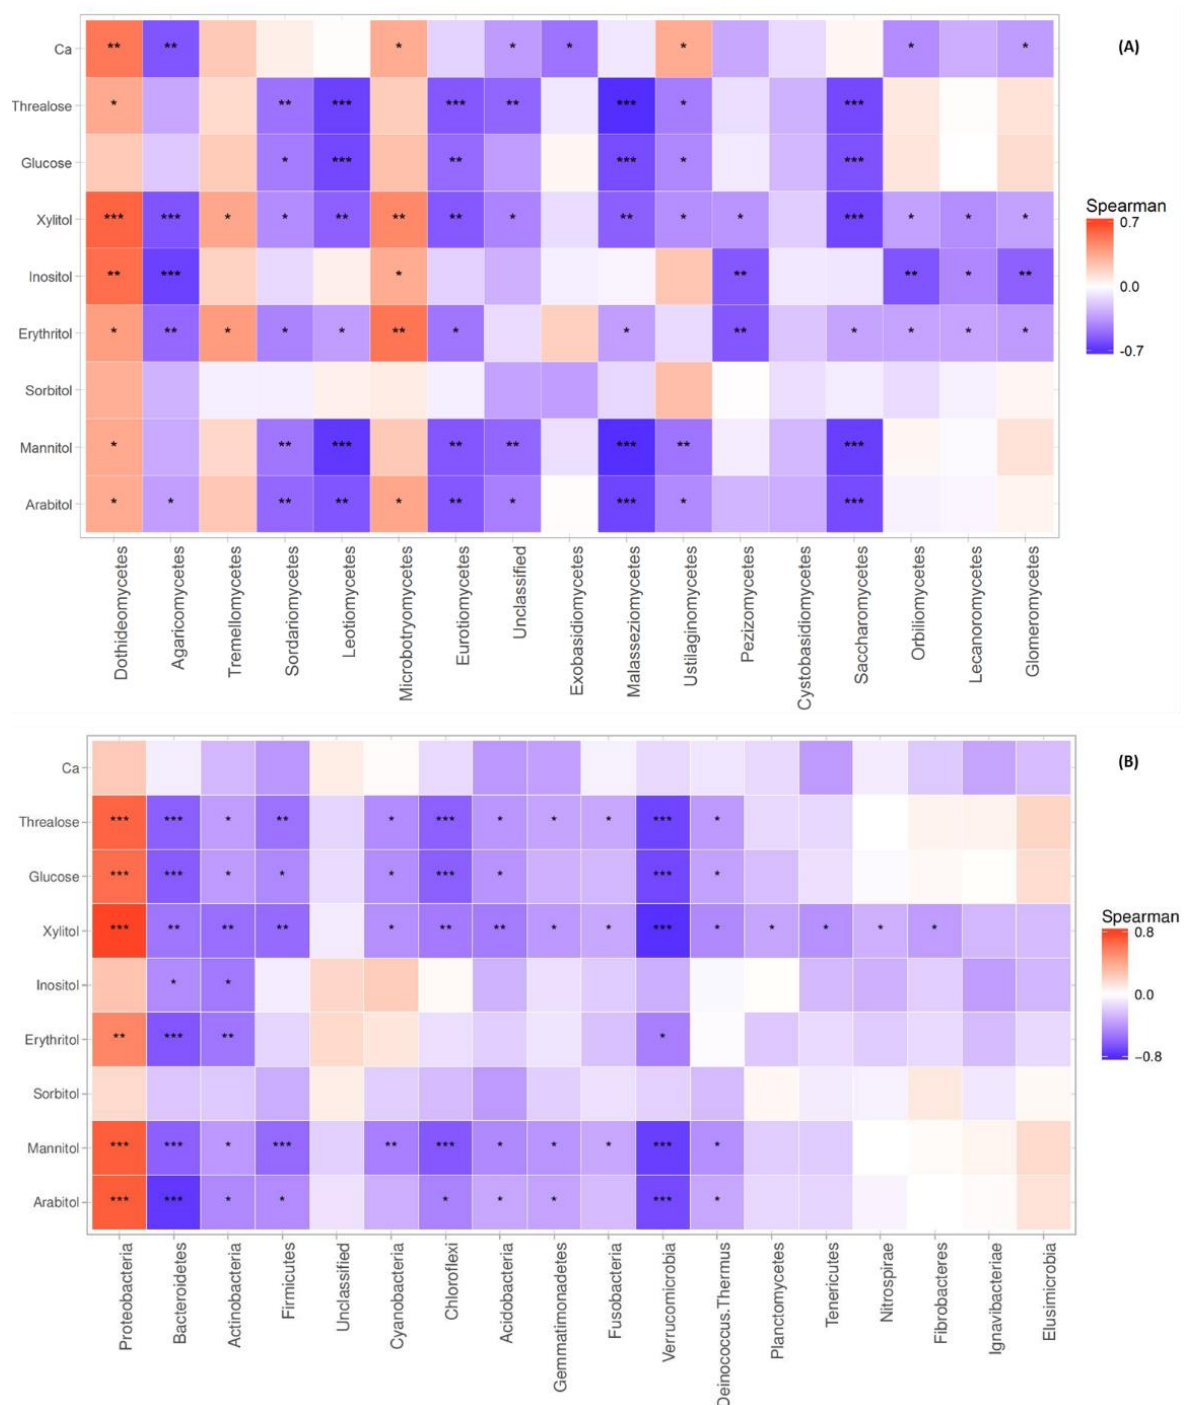

**Figure 5 : Heatmap of Spearman's rank correlation between SCs and abundance of airborne communities at the study site. (A) Fungal class-level and (B) bacterial phylum-level, respectively. Only genera with relative abundance  $\geq 1$  are shown.**

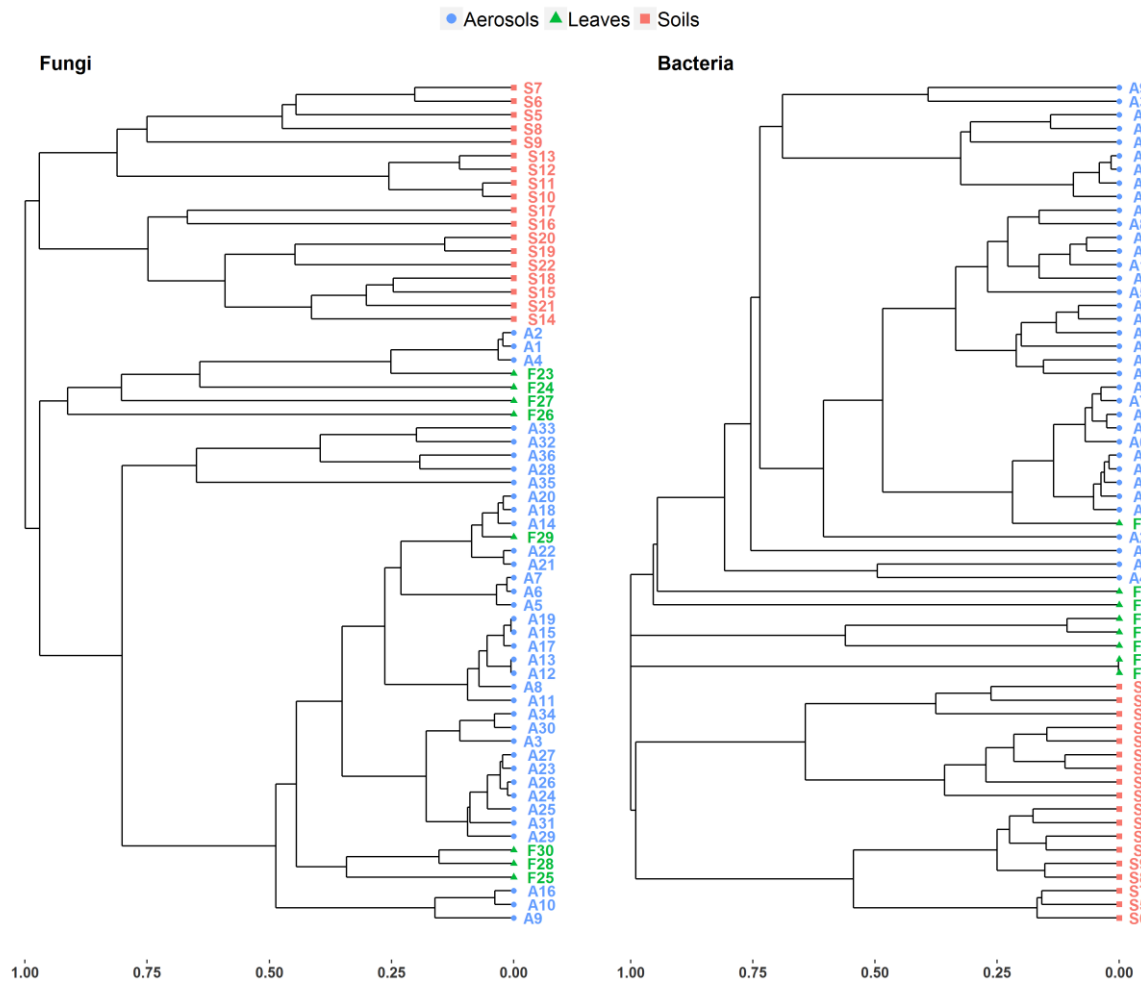

**Figure 6 : Unsupervised hierarchical clustering of all samples (Aerosols, Leaves and Soils) based on Horn distance matrix. Dissimilarity matrixes have been calculated on the rarefied MOTUs tables.**

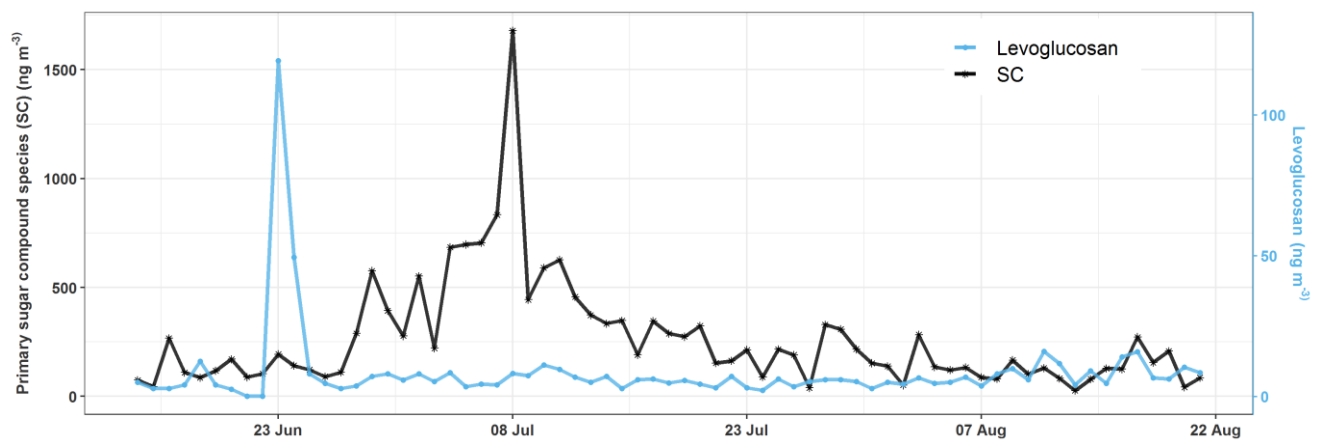

**Figure 7 : Temporal covariation cycles of daily particulate levoglucosan and primary sugar compounds during the sampling campaign period.**
